# Supplementary material
Source: PubMed Central journal article supplement (PMC4275001)
Supplement: NIHMS629947-supplement-2.pdf [file NIHMS629947-supplement-2.pdf]

**Supplementary Table S1. List of antibodies.**

| <b>Antibody</b>                       | <b>Clone</b> | <b>Fluorochrome</b>   | <b>Source</b>         |
|---------------------------------------|--------------|-----------------------|-----------------------|
| LIVE/DEAD® Fixable<br>Dead Cell Stain |              | UV Blue               | life technologies™    |
| CD45                                  | HI30         | PerCP                 | BioLegend             |
| CD3e                                  | HIT3a        | Alexa Fluor® 700      | BioLegend             |
| CD4                                   | RPA-T4       | BD Horizon™ V500      | BD Biosciences        |
| CD8                                   | 3B5          | QDot® 705             | life technologies™    |
| CD28                                  | CD28.2       | APC                   | BioLegend             |
| CD27                                  | O323         | APC-Cy7               | BioLegend             |
| CD44                                  | IM7          | PE-Cy7                | BioLegend             |
| CD45RA                                | MEM-56       | PE-Texas Red®         | life technologies™    |
| CD62L                                 | MEL-14       | eFluor® 605NC         | eBioscience           |
| CD127                                 | A019D5       | Brilliant Violet 421™ | BioLegend             |
| CD132                                 | TUGh4        | PE                    | BioLegend             |
| CD218a                                | H44          | Biotin                | BioLegend             |
| KLRG1                                 | 13A2         | Alexa Fluor® 488      | Dr. Hanspeter Pircher |
| Streptavidin                          |              | QDot® 655             | life technologies™    |

Supplementary Fig. S1

A

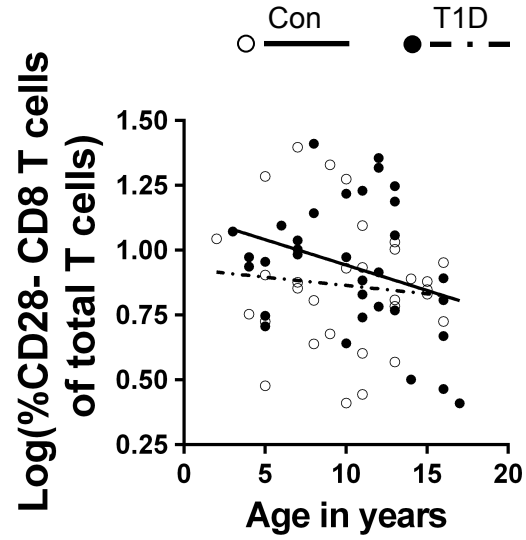

B

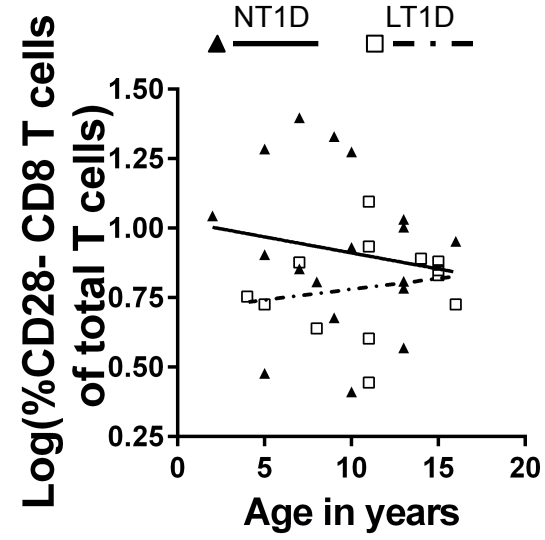

C

|                | Log(%CD28- CD8 T cells of total T cells) |                |         | Are slopes different? |         |
|----------------|------------------------------------------|----------------|---------|-----------------------|---------|
|                | r                                        | R <sup>2</sup> | P value | Y or N                | P value |
| <b>Control</b> | -0.3082                                  | 0.09499        | 0.081   | No                    | 0.4167  |
| <b>T1D</b>     | -0.1013                                  | 0.01026        | 0.5878  |                       |         |
| <b>NT1D</b>    | -0.1537                                  | 0.02361        | 0.5427  | No                    | 0.4266  |
| <b>LT1D</b>    | 0.1852                                   | 0.03431        | 0.5446  |                       |         |

Supplementary Fig. S2

A

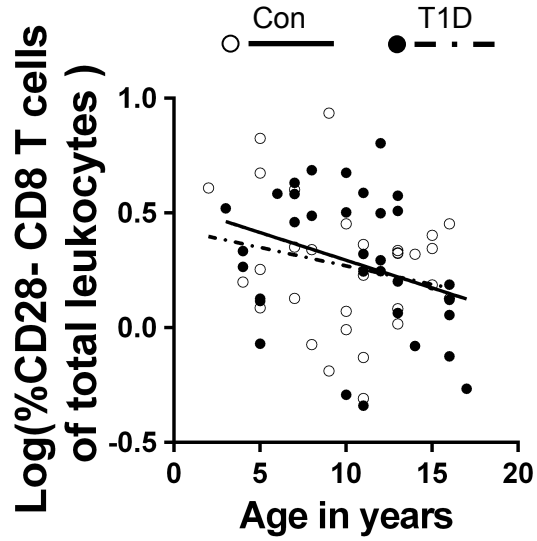

B

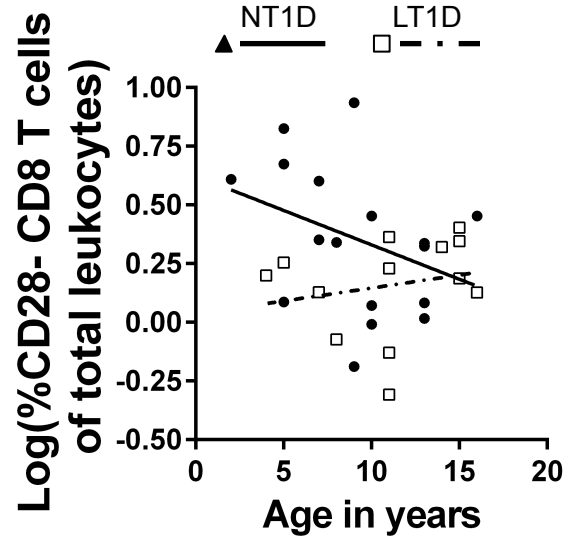

C

|                | Log(%CD28- CD8 T cells of total leukocytes) |                |         | Are slopes different? |         |
|----------------|---------------------------------------------|----------------|---------|-----------------------|---------|
|                | r                                           | R <sup>2</sup> | P value | Y or N                | P value |
| <b>Control</b> | -0.3154                                     | 0.09949        | 0.0738  | No                    | 0.6658  |
| <b>T1D</b>     | -0.2202                                     | 0.04847        | 0.2340  |                       |         |
| <b>NT1D</b>    | -0.3589                                     | 0.1288         | 0.1436  | No                    | 0.1273  |
| <b>LT1D</b>    | 0.2096                                      | 0.04395        | 0.4918  |                       |         |
